# Supplementary material
Source: publisher figshare collection journal article supplement (https://acs.figshare.com/ndownloader/files/5180950)
Supplement: Supplementary file 1 [file 5180950]

#============================================================================
data_global
#============================================================================

_audit_creation_date               17-11-03
_audit_creation_method
     from_MolEN_and_SHELXL
_audit_update_record
; ?
;

# 1. SUBMISSION DETAILS

 
_publ_contact_author_name     'Phillip E. Fanwick'
_publ_contact_author_address
;    Department of Chemistry
     Purdue University
     560 Oval Dr.
     W. Lafayette
     IN 47907-2084
     USA
;
_publ_contact_author_email     'pfanwick@purdue.edu'
_publ_contact_author_fax       '1(765)4940239'
_publ_contact_author_phone     '1(765)4944572'

_publ_requested_journal            ?
_publ_requested_category            ?
_publ_requested_coeditor_name      ?


# 2. PROCESSING SUMMARY (IUCr Office Use Only)

_journal_date_recd_electronic     ?
_journal_date_to_coeditor         ?
_journal_date_from_coeditor       ?
_journal_date_accepted            ?

_journal_date_printers_first      ?
_journal_date_printers_final      ?
_journal_date_proofs_out          ?
_journal_date_proofs_in           ?


_journal_coeditor_name            ?
_journal_coeditor_code            ?
_journal_coeditor_notes
; ?
;

_journal_techeditor_code          ?
_journal_techeditor_notes
; ?
;


_journal_coden_Cambridge            ?
_journal_name_full                ?
_journal_volume                 ?

_journal_year               ?

_journal_issue                    ?
_journal_page_first               ?
_journal_page_last                ?

_journal_suppl_publ_number        ?
_journal_suppl_publ_pages         ?

# 3. TITLE AND AUTHOR LIST

_publ_section_title
; ?
;
_publ_section_title_footnote
; ?
;

# The loop structure below should contain the names and addresses and footnotes
# of all authors, in the required order of publication. Repeat as necessary.

loop_
_publ_author_name
_publ_author_address
_publ_author_footnote

     'ROTHWELL'
;    Department of Chemistry
     Purdue University 
     W. Lafayette
     IN 47907
     USA
;
; ?
;

     'PHOMPHRAI'
;    Department of Chemistry
     Purdue University 
     W. Lafayette
     IN 47907
     USA
;
; ?
;

     'FANWICK, PHILLIP E.'
;    Department of Chemistry
     Purdue University 
     W. Lafayette
     IN 47907
     USA
;
; ?
;


# 4. TEXT

_publ_section_abstract
; ?
;

_publ_section_comment
; ?
;


_database_code_CSD  'KP1   '

_publ_section_experimental
; ?
;


_publ_section_references
;


P. T. Beurskens, G. Beurskens, R. deGelder,S. Garcia-Granda,
R. O. Gould, R. Israel, J. M. M. Smits, (1999).
The DIRDIF-99 Program System. Crystallography Laboratory,
Univ. of Nijmegen, The Netherlands.

Enraf-Nonius (1993), CAD4 Express, Enraf-Nonius, Delft, The Netherlands.

Johnson, C.K. (1976). ORTEP. Report ORNL-5138.  Oak Ridge National Laboratory,
Tennessee, USA.

Nonius(1998), Collect Users Manual, Nonius Delft, The Netherlands.

Otwinowski Z. & Minor, W. (1997). Methods Enzymol.,      276, 307-327.

Sheldrick, G.M. (1997). SHELXL97, Program for the Refinement of Crystal
Structures. Univ. of G\"ottingen, Germany.

Spek A.L.(1997) PLATON. Program. Univ. of Ultrecht,
  The Netherlands

;

_publ_section_figure_captions
; ?
;


_publ_section_acknowledgements
;?
;


data_KP1   

# 5. CRYSTAL DATA

_chemical_compound_source          ?
_exptl_crystal_description         needle              
_exptl_crystal_colour              'yellow'
_exptl_crystal_size_max            0.30
_exptl_crystal_size_mid            0.19
_exptl_crystal_size_min            0.13
_chemical_name_systematic
; ?
;
_exptl_crystal_density_method      ?

_chemical_formula_sum              'C15 H19 Br1 O1 Ti1'
_chemical_formula_moiety       'C15 H19 Br1 O1 Ti1'
_chemical_formula_structural       ?
_chemical_formula_weight              343.13
_symmetry_cell_setting             triclinic
_symmetry_space_group_name_H-M     'P -1'
loop_
 _symmetry_equiv_pos_as_xyz
   'x, y, z' 
   '-x, -y, -z' 
 
_cell_length_a                      7.6461(12)  
_cell_length_b                       9.6760(7)  
_cell_length_c                      11.1248(10) 
_cell_angle_alpha                   67.703(4)   
_cell_angle_beta                    82.617(5)   
_cell_angle_gamma                   88.058(7)   
_cell_volume                        755.10(15)  
_cell_measurement_reflns_used        9504
_cell_measurement_theta_min          2
_cell_measurement_theta_max         27
_cell_formula_units_z                2
_exptl_crystal_density_diffrn      1.51
_exptl_crystal_density_meas        ?
loop_
_atom_type_symbol
_atom_type_radius_bond
Br  1.14
Ti  1.32
 O  0.73
 C  0.77
 H  0.32
 
_diffrn_radiation_type             MO-K\a
_diffrn_radiation_wavelength         0.71073
_exptl_absorpt_coefficient_mu          3.168
_cell_measurement_temperature        150
_exptl_crystal_F_000                 348

# 6. DATA COLLECTION

_diffrn_ambient_temperature         150
_diffrn_measurement_device_type    Nonius_KappaCCD
_diffrn_measurement_method         \w
_exptl_absorpt_correction_type     multi-scan_(Otwinowski_&_Minor,_1997
_exptl_absorpt_correction_T_min    0.3044
_exptl_absorpt_correction_T_max    0.6730
_diffrn_reflns_number                9504
_diffrn_measured_fraction_theta_max 0.9860
_diffrn_reflns_theta_full            26.7
_diffrn_measured_fraction_theta_full     0.9970
_reflns_number_total                 3560
_reflns_number_gt                    2979
_reflns_threshold_expression         >2.0\s(I)
_diffrn_reflns_av_R_equivalents    0.032
_diffrn_reflns_theta_min            2.28
_diffrn_reflns_theta_max           27.90
_diffrn_reflns_limit_h_min             0
_diffrn_reflns_limit_k_min           -12
_diffrn_reflns_limit_l_min           -14
_diffrn_reflns_limit_h_max            10
_diffrn_reflns_limit_k_max            12
_diffrn_reflns_limit_l_max            14
_diffrn_special_details           'mosaicity from Denzo/Scalepack is 0.47'

# 7. REFINEMENT DATA


_refine_special_details
;
Refinement on F^2^ for ALL reflections except for   0 with very negative F^2^
or flagged by the user for potential systematic errors.  Weighted R-factors
wR and all goodnesses of fit S are based on F^2^, conventional R-factors R
are based on F, with F set to zero for negative F^2^. The observed criterion
of F^2^ > 2sigma(F^2^) is used only for calculating R_factor_obs etc. and is
not relevant to the choice of reflections for refinement.  R-factors based
on F^2^ are statistically about twice as large as those based on F, and R-
factors based on ALL data will be even larger.
;


_refine_ls_structure_factor_coef   Fsqd
_refine_ls_matrix_type             full
_refine_ls_R_factor_all            0.036
_refine_ls_R_factor_gt             0.028
_refine_ls_wR_factor_ref           0.071
_refine_ls_wR_factor_gt           0.069
_refine_ls_hydrogen_treatment      constr
_refine_ls_number_reflns             3559
_refine_ls_number_parameters          167
_refine_ls_number_restraints            0
_refine_ls_goodness_of_fit_ref      0.991
_refine_ls_weighting_scheme  'calc '
_refine_ls_weighting_details
'1/[\s^2^(Fo^2^)+(0.0422P)^2^+0.0000P] where P=(Fo^2^+2Fc^2^)/3  '

_refine_ls_shift/su_max           0.001
_refine_diff_density_max            0.31
_refine_diff_density_min           -0.54
_refine_ls_extinction_method       none
_atom_type_scat_source
'International Tables for Crystallography (Vol C)'


# 8. COMPUTING DATA


_computing_data_collection         Collect_(Nonius,_1998)
_computing_cell_refinement         DENZO/SCALEPACK_(Otwinowski,_1996)
_computing_data_reduction          DENZO/SCALEPACK_(Otwinowski,_1996)
_computing_structure_solution      PATTY_(DIRDIF99,_Beurskins,_1999)
_computing_structure_refinement    SHELX97_(Sheldrick,_1997)
_computing_molecular_graphics
;
    ORTEP (Johnson, 1976)
    PLATON (Spek, 1997)
;
_computing_publication_material    CIF_VAX_MolEN_(Fair,_1990)

# 9. ATOMIC COORDINATES AND THERMAL PARAMETERS


loop_
_atom_site_label
_atom_site_type_symbol
_atom_site_fract_x
_atom_site_fract_y
_atom_site_fract_z
_atom_site_U_iso_or_equiv
_atom_site_adp_type
_atom_site_occupancy
_atom_site_symmetry_multiplicity
_atom_site_calc_flag
_atom_site_refinement_flags
_atom_site_disorder_assembly
_atom_site_disorder_group

Br(14) Br 0.10935(3) 0.39592(2) -0.26774(2) 0.03822(8) Uani 1 1 d . . .         
Ti Ti 0.74876(4) -0.23419(3) -0.23400(3) 0.02208(9) Uani 1 1 d . . .            
O(1) O 0.65159(18) -0.08337(13) -0.19057(12) 0.0277(3) Uani 1 1 d . . .         
C(1) C 0.4657(3) 0.2049(2) -0.6241(2) 0.0358(5) Uani 1 1 d . . .                
C(2) C 0.4799(3) 0.3527(2) -0.7144(2) 0.0367(5) Uani 1 1 d . . .                
C(3) C 0.3231(3) 0.4250(2) -0.6942(2) 0.0365(5) Uani 1 1 d . . .                
C(4) C 0.2130(3) 0.3232(2) -0.5924(2) 0.0361(5) Uani 1 1 d . . .                
C(5) C 0.3012(3) 0.1864(2) -0.54929(18) 0.0358(5) Uani 1 1 d . . .              
C(6) C 0.7592(3) -0.4089(2) -0.0533(2) 0.0408(5) Uani 1 1 d . . .               
C(7) C 1.0168(3) -0.1724(2) -0.2891(2) 0.0391(5) Uani 1 1 d . . .               
C(11) C 0.5298(3) 0.02518(18) -0.20570(17) 0.0251(4) Uani 1 1 d . . .           
C(12) C 0.5711(3) 0.16815(19) -0.30138(17) 0.0268(4) Uani 1 1 d . . .           
C(13) C 0.4433(3) 0.27749(19) -0.31732(18) 0.0282(4) Uani 1 1 d . . .           
C(14) C 0.2830(3) 0.2446(2) -0.24015(18) 0.0287(4) Uani 1 1 d . . .             
C(15) C 0.2435(3) 0.1043(2) -0.14362(19) 0.0309(4) Uani 1 1 d . . .             
C(16) C 0.3679(3) -0.0077(2) -0.12571(18) 0.0288(4) Uani 1 1 d . . .            
C(121) C 0.7473(3) 0.2011(2) -0.3832(2) 0.0346(4) Uani 1 1 d . . .              
C(161) C 0.3294(3) -0.1626(2) -0.0230(2) 0.0361(4) Uani 1 1 d . . .             
H(1) H 0.5528 0.1305 -0.6154 0.043 Uiso 1 1 calc R . .                          
H(2) H 0.5782 0.3963 -0.7781 0.044 Uiso 1 1 calc R . .                          
H(3) H 0.2968 0.5263 -0.7419 0.044 Uiso 1 1 calc R . .                          
H(4) H 0.0986 0.3424 -0.5581 0.043 Uiso 1 1 calc R . .                          
H(5) H 0.2562 0.0968 -0.4808 0.043 Uiso 1 1 calc R . .                          
H(13) H 0.4670 0.3751 -0.3817 0.034 Uiso 1 1 calc R . .                         
H(15) H 0.1327 0.0849 -0.0903 0.037 Uiso 1 1 calc R . .                         
H(6A) H 0.8122 -0.3724 0.0050 0.061 Uiso 1 1 calc R . .                         
H(6B) H 0.8308 -0.4894 -0.0659 0.061 Uiso 1 1 calc R . .                        
H(6C) H 0.6396 -0.4468 -0.0142 0.061 Uiso 1 1 calc R . .                        
H(7A) H 1.0318 -0.0917 -0.3759 0.059 Uiso 1 1 calc R . .                        
H(7B) H 1.0855 -0.2587 -0.2918 0.059 Uiso 1 1 calc R . .                        
H(7C) H 1.0580 -0.1378 -0.2253 0.059 Uiso 1 1 calc R . .                        
H(12A) H 0.8404 0.1805 -0.3262 0.052 Uiso 1 1 calc R . .                        
H(12B) H 0.7540 0.3065 -0.4423 0.052 Uiso 1 1 calc R . .                        
H(12C) H 0.7627 0.1380 -0.4348 0.052 Uiso 1 1 calc R . .                        
H(16A) H 0.2217 -0.1613 0.0346 0.054 Uiso 1 1 calc R . .                        
H(16B) H 0.4283 -0.1948 0.0287 0.054 Uiso 1 1 calc R . .                        
H(16C) H 0.3134 -0.2323 -0.0659 0.054 Uiso 1 1 calc R . .                       

loop_
_atom_site_aniso_label
_atom_site_aniso_U_11
_atom_site_aniso_U_22
_atom_site_aniso_U_33
_atom_site_aniso_U_12
_atom_site_aniso_U_13
_atom_site_aniso_U_23
Br(14)  0.03551(14)  0.03739(12)  0.04791(14)  0.01321(9)  -0.01316(10)  -0.02156(10)
Ti  0.01965(18)  0.02306(15)  0.02373(16)  0.00121(12)  -0.00322(13)  -0.00900(12)
O(1)  0.0274(7)  0.0277(6)  0.0303(7)  0.0033(5)  -0.0039(5)  -0.0136(5)
C(1)  0.0324(12)  0.0417(10)  0.0406(11)  0.0113(9)  -0.0186(9)  -0.0201(9)
C(2)  0.0279(11)  0.0460(11)  0.0375(11)  -0.0103(9)  -0.0053(9)  -0.0161(9)
C(3)  0.0441(13)  0.0282(9)  0.0440(11)  0.0009(8)  -0.0171(10)  -0.0174(8)
C(4)  0.0301(11)  0.0511(12)  0.0373(11)  0.0040(9)  -0.0052(9)  -0.0280(9)
C(5)  0.0422(13)  0.0382(10)  0.0246(9)  -0.0044(9)  -0.0094(9)  -0.0072(8)
C(6)  0.0509(14)  0.0371(10)  0.0297(10)  0.0043(9)  -0.0111(10)  -0.0059(8)
C(7)  0.0236(11)  0.0497(12)  0.0497(12)  -0.0041(9)  -0.0016(9)  -0.0256(10)
C(11)  0.0259(10)  0.0245(8)  0.0284(9)  0.0019(7)  -0.0038(7)  -0.0138(7)
C(12)  0.0287(10)  0.0282(8)  0.0255(9)  -0.0025(7)  -0.0026(7)  -0.0125(7)
C(13)  0.0332(11)  0.0258(8)  0.0282(9)  -0.0005(7)  -0.0064(8)  -0.0121(7)
C(14)  0.0283(10)  0.0295(8)  0.0340(10)  0.0055(7)  -0.0083(8)  -0.0174(7)
C(15)  0.0262(11)  0.0332(9)  0.0363(10)  0.0012(8)  -0.0001(8)  -0.0177(8)
C(16)  0.0296(11)  0.0284(8)  0.0302(9)  -0.0014(7)  -0.0019(8)  -0.0135(7)
C(121)  0.0309(11)  0.0335(9)  0.0364(10)  -0.0026(8)  0.0027(9)  -0.0117(8)
C(161)  0.0370(12)  0.0292(9)  0.0361(10)  -0.0027(8)  0.0037(9)  -0.0080(8)

# 10. MOLECULAR GEOMETRY


_geom_special_details
;
All esds (except the esd in the dihedral angle between two l.s. planes)
are estimated using the full covariance matrix.  The cell esds are taken
into account individually in the estimation of esds in distances, angles
and torsion angles; correlations between esds in cell parameters are only
used when they are defined by crystal symmetry.  An approximate (isotropic)
treatment of cell esds is used for estimating esds involving l.s. planes.
;


loop_
_geom_bond_atom_site_label_1
_geom_bond_atom_site_label_2
_geom_bond_distance
_geom_bond_site_symmetry_1
_geom_bond_site_symmetry_2
_geom_bond_publ_flag
Br(14)  C(14)  1.9059(18)  .  . ?
Ti  O(1)  1.8123(12)  .  . ?
Ti  C(6)  2.0875(19)  .  . ?
Ti  C(7)  2.101(2)  .  . ?
Ti  C(5)  2.3561(18)  .  2_654 ?
Ti  C(1)  2.3572(19)  .  2_654 ?
Ti  C(2)  2.365(2)  .  2_654 ?
Ti  C(3)  2.3771(18)  .  2_654 ?
Ti  C(4)  2.3781(19)  .  2_654 ?
O(1)  C(11)  1.356(2)  .  . ?
C(1)  C(5)  1.393(3)  .  . ?
C(1)  C(2)  1.399(3)  .  . ?
C(1)  Ti  2.3571(19)  .  2_654 ?
C(2)  C(3)  1.405(3)  .  . ?
C(2)  Ti  2.3652(19)  .  2_654 ?
C(3)  C(4)  1.388(3)  .  . ?
C(3)  Ti  2.3771(18)  .  2_654 ?
C(4)  C(5)  1.406(3)  .  . ?
C(4)  Ti  2.3781(19)  .  2_654 ?
C(5)  Ti  2.3561(18)  .  2_654 ?
C(11)  C(16)  1.398(3)  .  . ?
C(11)  C(12)  1.404(2)  .  . ?
C(12)  C(13)  1.392(3)  .  . ?
C(12)  C(121)  1.496(3)  .  . ?
C(13)  C(14)  1.375(3)  .  . ?
C(14)  C(15)  1.388(3)  .  . ?
C(15)  C(16)  1.391(3)  .  . ?
C(16)  C(161)  1.511(2)  .  . ?

loop_
_geom_angle_atom_site_label_1
_geom_angle_atom_site_label_2
_geom_angle_atom_site_label_3
_geom_angle
_geom_angle_site_symmetry_1
_geom_angle_site_symmetry_2
_geom_angle_site_symmetry_3
_geom_angle_publ_flag
O(1)  Ti  C(6)  103.64(8)  . .  . ?
O(1)  Ti  C(7)  103.72(7)  . .  . ?
C(6)  Ti  C(7)  100.80(9)  . .  . ?
O(1)  Ti  C(5)  107.46(6)  . .  2_654 ?
C(6)  Ti  C(5)  141.70(8)  . .  2_654 ?
C(7)  Ti  C(5)  93.05(8)  . .  2_654 ?
O(1)  Ti  C(1)  89.90(6)  . .  2_654 ?
C(6)  Ti  C(1)  126.11(9)  . .  2_654 ?
C(7)  Ti  C(1)  126.53(8)  . .  2_654 ?
C(5)  Ti  C(1)  34.39(8)  2_654 .  2_654 ?
O(1)  Ti  C(2)  107.52(7)  . .  2_654 ?
C(6)  Ti  C(2)  92.59(8)  . .  2_654 ?
C(7)  Ti  C(2)  141.87(8)  . .  2_654 ?
C(5)  Ti  C(2)  57.10(7)  2_654 .  2_654 ?
C(1)  Ti  C(2)  34.46(7)  2_654 .  2_654 ?
O(1)  Ti  C(3)  141.94(7)  . .  2_654 ?
C(6)  Ti  C(3)  84.79(8)  . .  2_654 ?
C(7)  Ti  C(3)  111.11(8)  . .  2_654 ?
C(5)  Ti  C(3)  56.92(7)  2_654 .  2_654 ?
C(1)  Ti  C(3)  57.18(7)  2_654 .  2_654 ?
C(2)  Ti  C(3)  34.46(8)  2_654 .  2_654 ?
O(1)  Ti  C(4)  141.97(6)  . .  2_654 ?
C(6)  Ti  C(4)  111.08(8)  . .  2_654 ?
C(7)  Ti  C(4)  84.90(8)  . .  2_654 ?
C(5)  Ti  C(4)  34.54(7)  2_654 .  2_654 ?
C(1)  Ti  C(4)  57.25(7)  2_654 .  2_654 ?
C(2)  Ti  C(4)  57.00(8)  2_654 .  2_654 ?
C(3)  Ti  C(4)  33.93(8)  2_654 .  2_654 ?
C(11)  O(1)  Ti  150.02(11)  . .  . ?
C(5)  C(1)  C(2)  107.84(18)  . .  . ?
C(5)  C(1)  Ti  72.76(11)  . .  2_654 ?
C(2)  C(1)  Ti  73.09(11)  . .  2_654 ?
C(1)  C(2)  C(3)  107.83(19)  . .  . ?
C(1)  C(2)  Ti  72.45(11)  . .  2_654 ?
C(3)  C(2)  Ti  73.24(11)  . .  2_654 ?
C(4)  C(3)  C(2)  108.31(18)  . .  . ?
C(4)  C(3)  Ti  73.07(11)  . .  2_654 ?
C(2)  C(3)  Ti  72.31(11)  . .  2_654 ?
C(3)  C(4)  C(5)  107.71(19)  . .  . ?
C(3)  C(4)  Ti  73.00(11)  . .  2_654 ?
C(5)  C(4)  Ti  71.87(11)  . .  2_654 ?
C(1)  C(5)  C(4)  108.31(18)  . .  . ?
C(1)  C(5)  Ti  72.85(11)  . .  2_654 ?
C(4)  C(5)  Ti  73.59(10)  . .  2_654 ?
O(1)  C(11)  C(16)  119.37(15)  . .  . ?
O(1)  C(11)  C(12)  118.68(17)  . .  . ?
C(16)  C(11)  C(12)  121.94(17)  . .  . ?
C(13)  C(12)  C(11)  117.93(18)  . .  . ?
C(13)  C(12)  C(121)  121.31(16)  . .  . ?
C(11)  C(12)  C(121)  120.75(17)  . .  . ?
C(14)  C(13)  C(12)  120.17(17)  . .  . ?
C(13)  C(14)  C(15)  121.93(17)  . .  . ?
C(13)  C(14)  Br(14)  118.94(14)  . .  . ?
C(15)  C(14)  Br(14)  119.12(15)  . .  . ?
C(14)  C(15)  C(16)  119.33(19)  . .  . ?
C(15)  C(16)  C(11)  118.67(17)  . .  . ?
C(15)  C(16)  C(161)  121.06(18)  . .  . ?
C(11)  C(16)  C(161)  120.27(17)  . .  . ?

loop_
 _geom_torsion_atom_site_label_1                                                
 _geom_torsion_atom_site_label_2                                                
 _geom_torsion_atom_site_label_3                                                
 _geom_torsion_atom_site_label_4                                                
 _geom_torsion                                                                  
 _geom_torsion_site_symmetry_1                                                  
 _geom_torsion_site_symmetry_2                                                  
 _geom_torsion_site_symmetry_3                                                  
 _geom_torsion_site_symmetry_4                                                  
 _geom_torsion_publ_flag                                                        
C(6) Ti O(1) C(11) -130.2(2) . . . . ?                                          
C(7) Ti O(1) C(11) 124.9(2) . . . . ?                                           
C(5) Ti O(1) C(11) 27.2(3) 2_654 . . . ?                                        
C(1) Ti O(1) C(11) -2.9(2) 2_654 . . . ?                                        
C(2) Ti O(1) C(11) -33.0(3) 2_654 . . . ?                                       
C(3) Ti O(1) C(11) -31.1(3) 2_654 . . . ?                                       
C(4) Ti O(1) C(11) 25.4(3) 2_654 . . . ?                                        
C(5) C(1) C(2) C(3) 0.2(2) . . . . ?                                            
Ti C(1) C(2) C(3) 65.20(14) 2_654 . . . ?                                       
C(5) C(1) C(2) Ti  -64.96(14) . . . 2_654 ?                                     
C(1) C(2) C(3) C(4) 0.0(2) . . . . ?                                            
Ti C(2) C(3) C(4) 64.69(14) 2_654 . . . ?                                       
C(1) C(2) C(3) Ti  -64.68(13) . . . 2_654 ?                                     
C(2) C(3) C(4) C(5) -0.3(2) . . . . ?                                           
Ti C(3) C(4) C(5) 63.94(13) 2_654 . . . ?                                       
C(2) C(3) C(4) Ti  -64.20(14) . . . 2_654 ?                                     
C(2) C(1) C(5) C(4) -0.4(2) . . . . ?                                           
Ti C(1) C(5) C(4) -65.57(13) 2_654 . . . ?                                      
C(2) C(1) C(5) Ti  65.18(13) . . . 2_654 ?                                      
C(3) C(4) C(5) C(1) 0.4(2) . . . . ?                                            
Ti C(4) C(5) C(1) 65.09(14) 2_654 . . . ?                                       
C(3) C(4) C(5) Ti  -64.68(13) . . . 2_654 ?                                     
Ti O(1) C(11) C(16) 91.4(3) . . . . ?                                           
Ti O(1) C(11) C(12) -88.9(3) . . . . ?                                          
O(1) C(11) C(12) C(13) 178.80(15) . . . . ?                                     
C(16) C(11) C(12) C(13) -1.5(3) . . . . ?                                       
O(1) C(11) C(12) C(121) -1.2(3) . . . . ?                                       
C(16) C(11) C(12) C(121) 178.43(17) . . . . ?                                   
C(11) C(12) C(13) C(14) 0.5(3) . . . . ?                                        
C(121) C(12) C(13) C(14) -179.49(17) . . . . ?                                  
C(12) C(13) C(14) C(15) 1.0(3) . . . . ?                                        
C(12) C(13) C(14) Br(14) -178.50(13) . . . . ?                                  
C(13) C(14) C(15) C(16) -1.3(3) . . . . ?                                       
Br(14) C(14) C(15) C(16) 178.12(13) . . . . ?                                   
C(14) C(15) C(16) C(11) 0.3(3) . . . . ?                                        
C(14) C(15) C(16) C(161) -179.17(17) . . . . ?                                  
O(1) C(11) C(16) C(15) -179.17(15) . . . . ?                                    
C(12) C(11) C(16) C(15) 1.2(3) . . . . ?                                        
O(1) C(11) C(16) C(161) 0.3(3) . . . . ?                                        
C(12) C(11) C(16) C(161) -179.38(16) . . . . ?                                  
    
